# Supplementary material for: Oxygen-deficient photostable Cu2O for enhanced visible light photocatalytic activity
Source: Royal Society of Chemistry journal article supplement (doi:10.1039/c7nr08388b), 2018-01-01
Supplement: c7nr08388b1.pdf [file c7nr08388b1.pdf]

## Electronic Supplementary Information

### **Oxygen-deficient photostable Cu<sub>2</sub>O for enhanced visible light photocatalytic activity**

Mandeep Singh<sup>a,†</sup>, Deshetti Jampaiah<sup>a,†,\*</sup>, Ahmad E. Kandjani<sup>b</sup>, Ylias M. Sabri<sup>b</sup>, Enrico Della Gaspera<sup>c</sup>, Philipp Reineck<sup>d</sup>, Martyna Judd<sup>e</sup>, Julien Langley<sup>e</sup>, Nicholas Cox<sup>e</sup>, Joel van Embden<sup>c</sup>, Edwin L. H. Mayes<sup>f</sup>, Brant C. Gibson<sup>d</sup>, Suresh K. Bhargava<sup>b</sup>, Rajesh Ramanathan<sup>a</sup>, Vipul Bansal<sup>a,\*</sup>

<sup>a</sup>Ian Potter NanoBioSensing Facility, NanoBiotechnology Research Laboratory, School of Science, RMIT University, Melbourne VIC 3000, Australia

<sup>b</sup>Center for Advanced Materials and Industrial Chemistry, School of Science, RMIT University, Melbourne VIC 3000, Australia

<sup>c</sup>School of Science, RMIT University, Melbourne VIC 3000, Australia

<sup>d</sup>ARC Centre of Excellence for Nanoscale BioPhotonics, School of Science, RMIT University, Melbourne VIC 3000, Australia

<sup>e</sup>Research School of Chemistry, Australian National University, Canberra VIC ACT 30002601, Australia

<sup>f</sup>RMIT Microscopy and Microanalysis Facility, School of Science, RMIT University, Melbourne VIC 3000, Australia

<sup>†</sup>*Equal contributing authors*

<sup>\*</sup>*E-mail: vipul.bansal@rmit.edu.au; jampaiah.deshetti@rmit.edu.au*

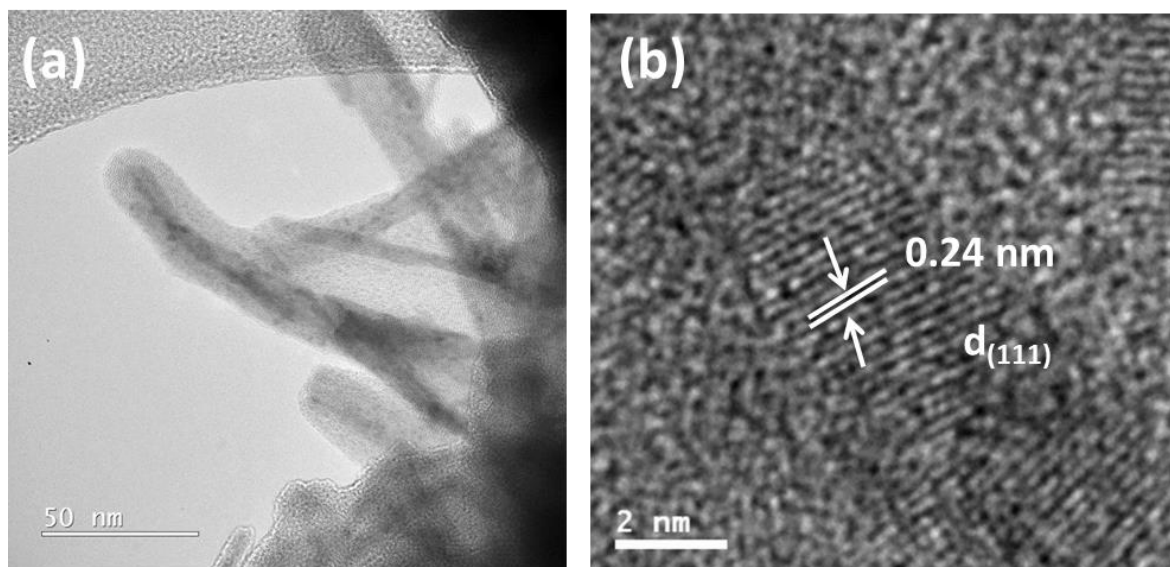

**Fig. S1** HR-TEM images of Cu<sub>2</sub>O nanotubes formed after 10 sec of reaction at room temperature.

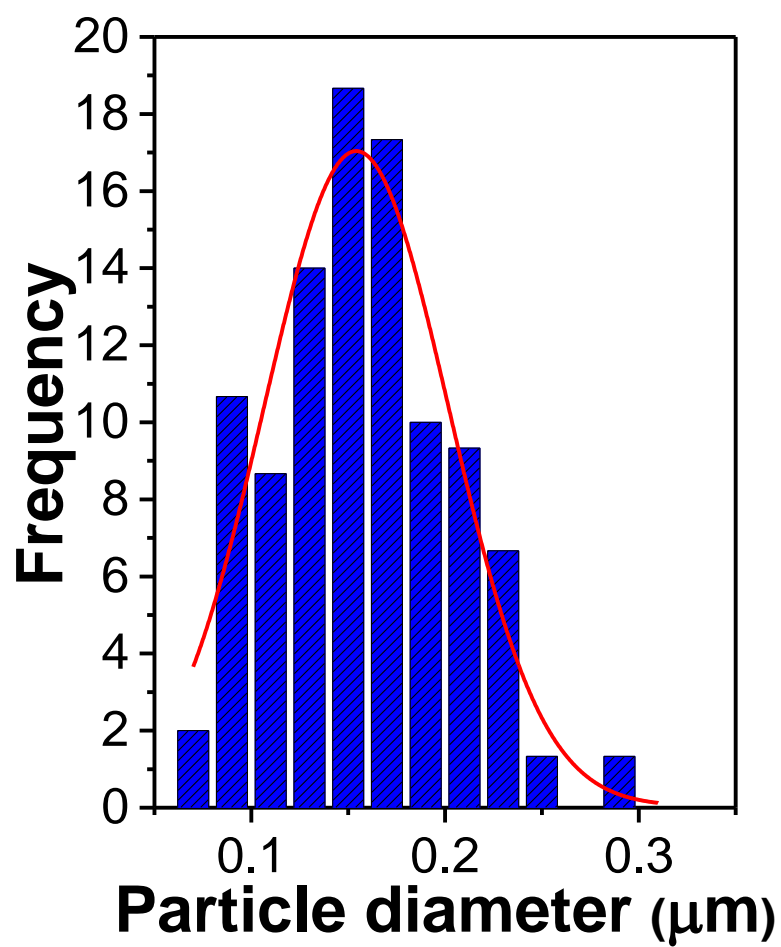

**Fig. S2** Particle size distribution of as-synthesised Cu<sub>2</sub>O nanoparticles, as determined by SEM.

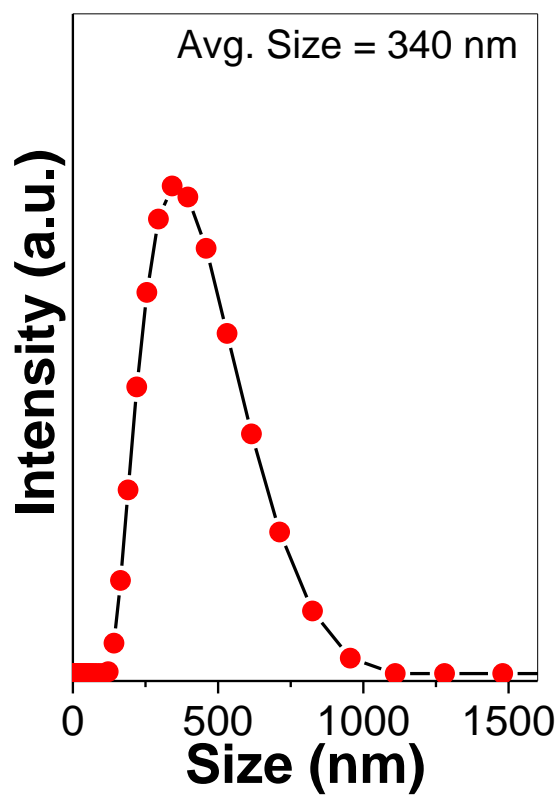

**Fig. S3** Hydrodynamic diameter of as-synthesised Cu<sub>2</sub>O nanoparticles in water, as determined by DLS.

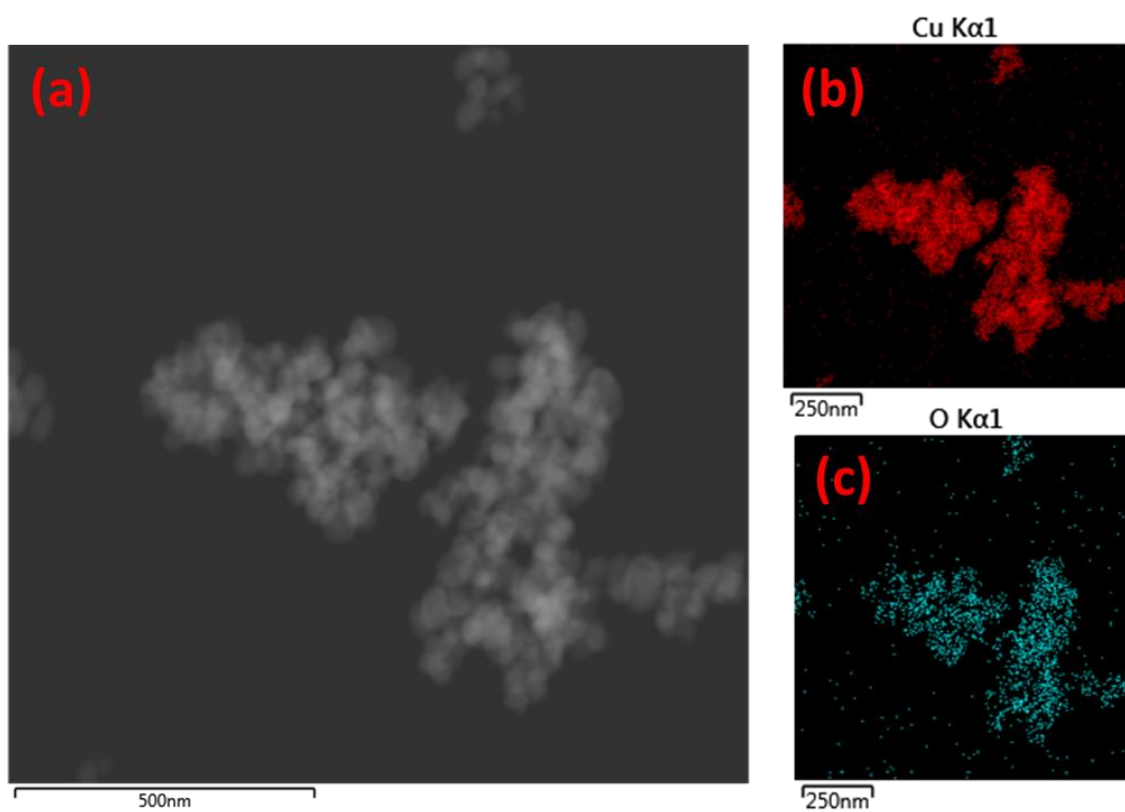

**Fig. S4** EDX mapping of as-synthesised  $\text{Cu}_2\text{O}$  nanoparticles obtained on a nickel TEM grid.

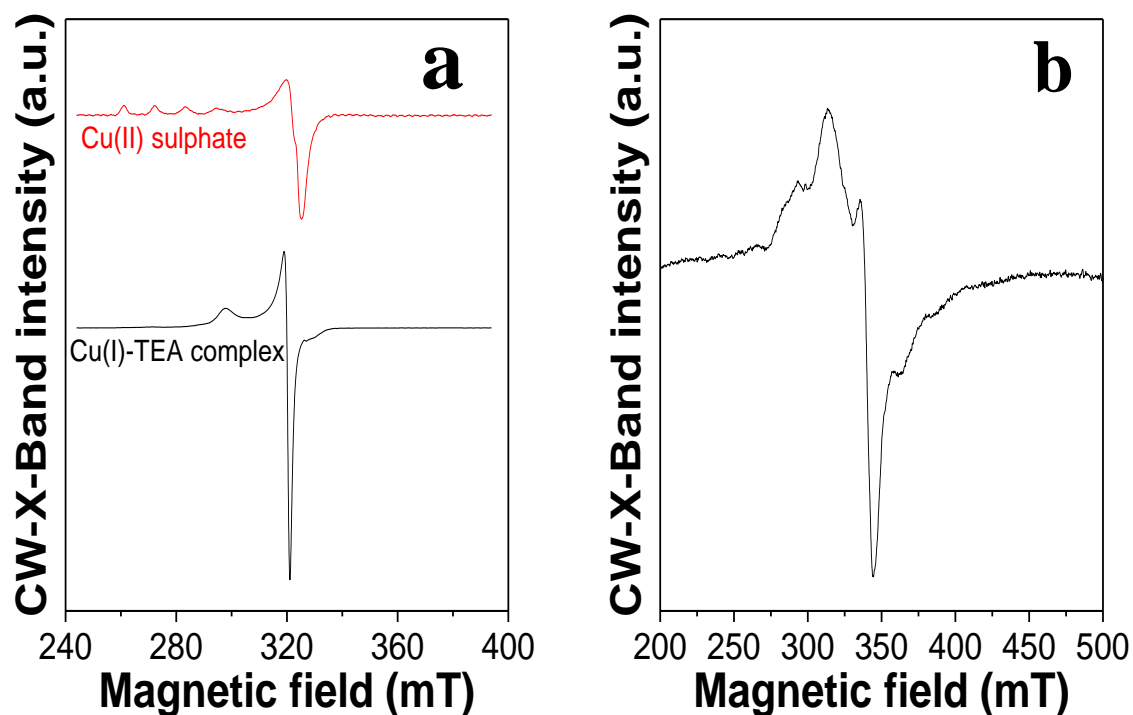

**Fig. S5** (a) Low-temperature (20 K) CW-X-Band EPR spectra of the Cu(I)-TEA complex and  $\text{CuSO}_4$  standard. The spectra have been scaled for clarity. Instrument settings: microwave power – 63  $\mu\text{W}$ ; and field modulation amplitude – 2.0 mT; (b) Room-temperature CW-X-Band powder EPR spectra of oxygen-deficient  $\text{Cu}_2\text{O}$  nanoparticles. The baseline (EPR spectrum of the empty resonator) is subtracted from the obtained trace. Instrument settings: microwave power – 6.3 mW; and field modulation amplitude – 1.0 mT.

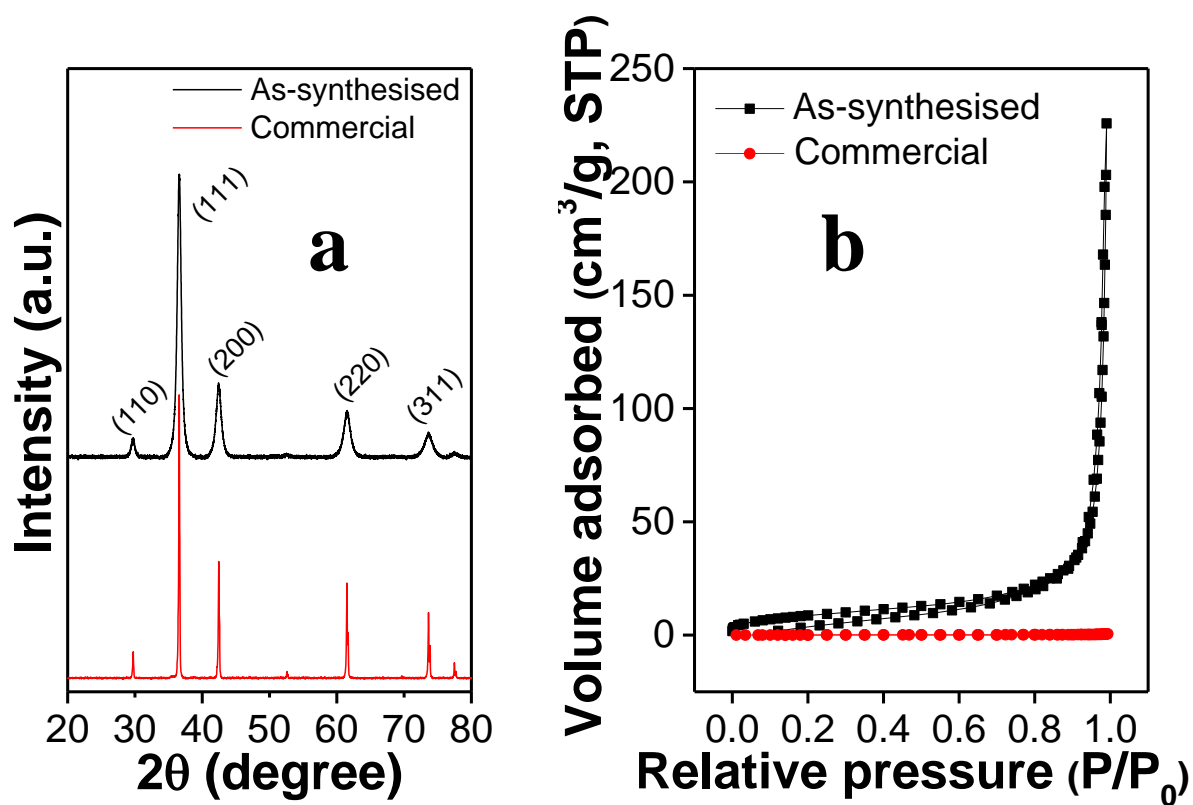

**Fig. S6** (a) Powder XRD, and (b)  $\text{N}_2$  sorption isotherms of as-synthesised  $\text{Cu}_2\text{O}$  nanoparticles and commercial  $\text{Cu}_2\text{O}$ .

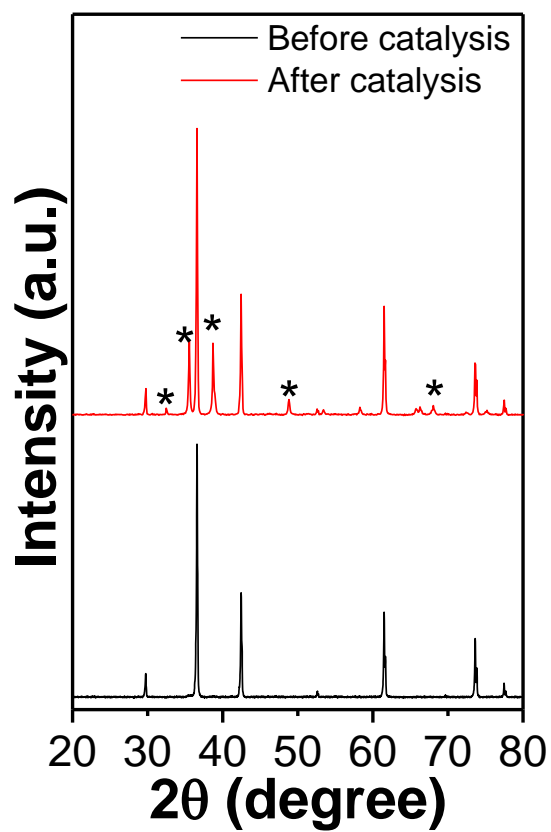

**Fig. S7** XRD patterns of commercial Cu<sub>2</sub>O nanoparticles before and after visible light-induced photooxidative degradation of methyl orange. The appearance of CuO signatures (marked with \*) after photocatalysis reaction due to oxidation of commercial Cu<sub>2</sub>O are noted.



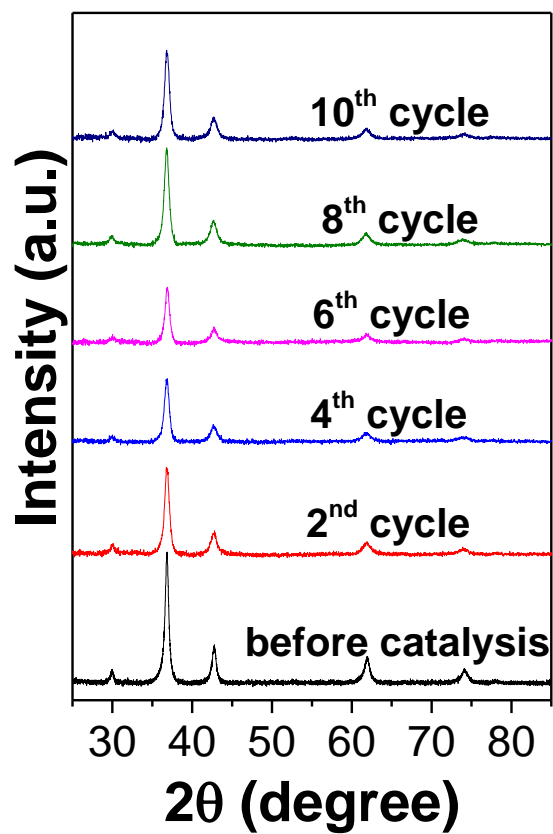

**Fig. S8** XRD patterns of as-synthesised oxygen-deficient Cu<sub>2</sub>O nanoparticles after repeated cycles of visible light-induced photo-oxidative degradation of methyl orange.

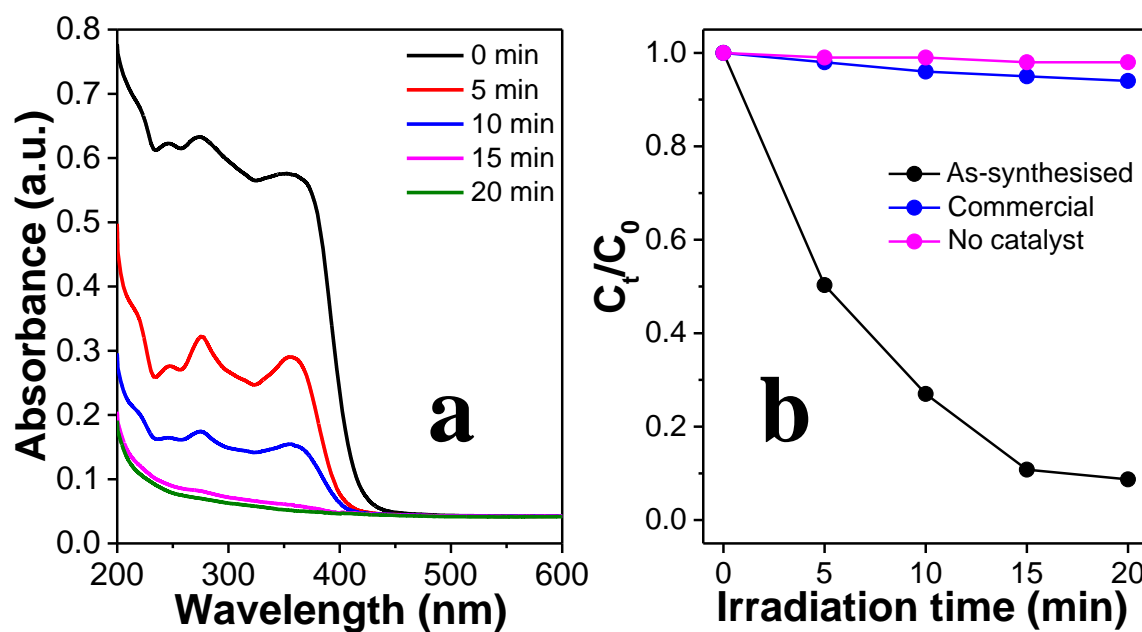

**Fig. S9** (a) Photo-oxidation of tetracycline using oxygen-deficient  $\text{Cu}_2\text{O}$ , as evident from the UV-Vis absorption spectra of tetracycline after visible light photo-irradiation over 20 minutes; (b) plots of  $C_t/C_0$  vs. irradiation time depicting the photodegradation of tetracycline in the presence of different catalysts.

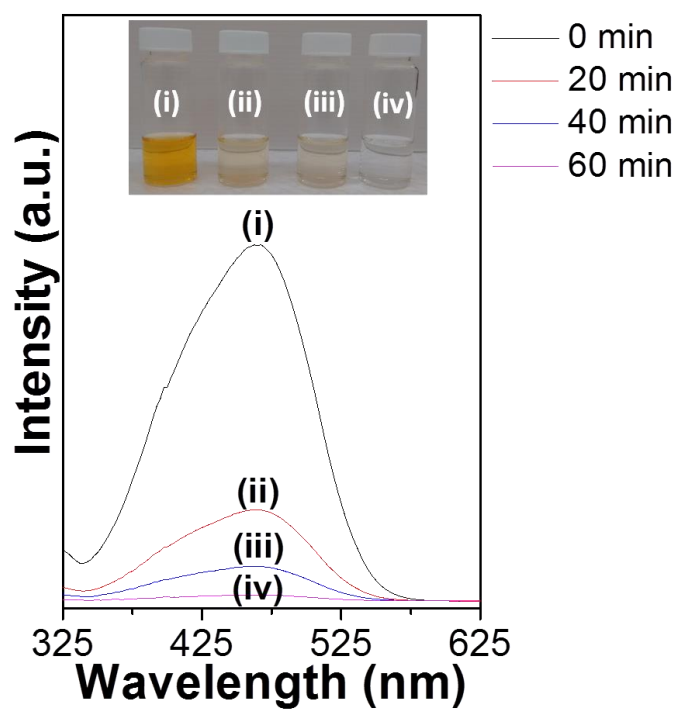

**Fig. S10** Absorption spectra of MO over 1 h of exposure to simulated solar light in the presence of oxygen-deficient  $\text{Cu}_2\text{O}$  nanoparticles. Insets show the colours of the corresponding solutions.

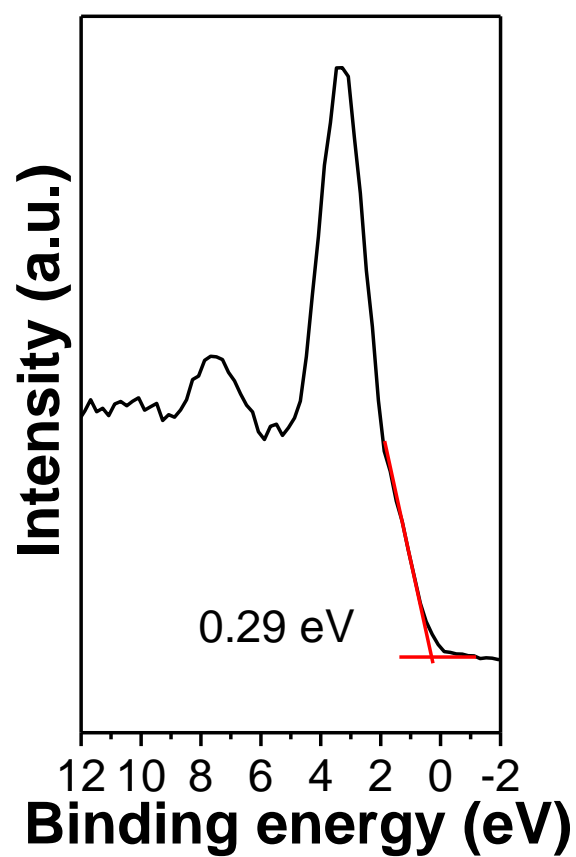

**Fig. S11** Valence band XPS spectrum of oxygen-deficient Cu<sub>2</sub>O nanoparticles.

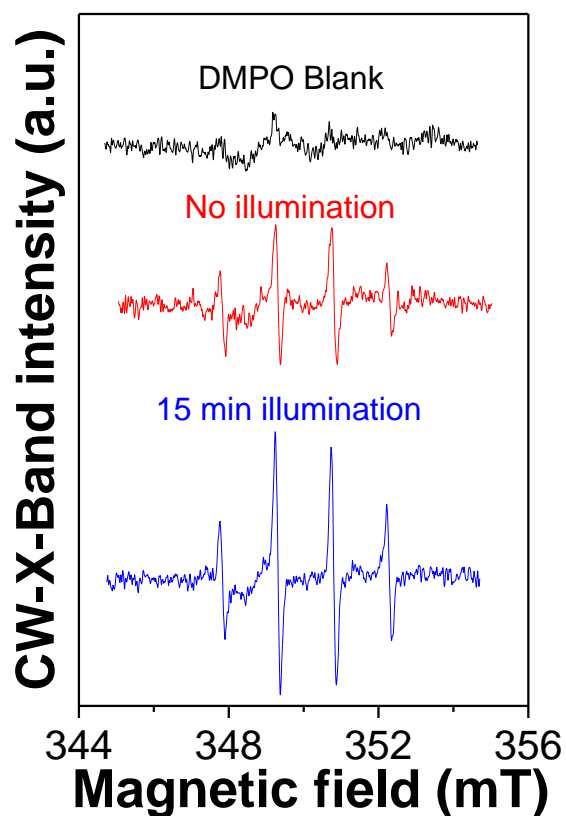

**Fig. S12** Liquid solution CW-X-Band EPR Spectra of the DPMO-OH adduct generated by white light illumination of oxygen-deficient  $\text{Cu}_2\text{O}$  nanoparticles. Top trace: DMPO solution with no  $\text{Cu}_2\text{O}$  added; middle trace DMPO/ $\text{Cu}_2\text{O}$  reaction mixture before exposure to light; bottom trace DMPO / $\text{Cu}_2\text{O}$  reaction mixture after 15 min illumination. Instrument settings: microwave power – 200 mW; and field modulation amplitude – 0.1 mT.

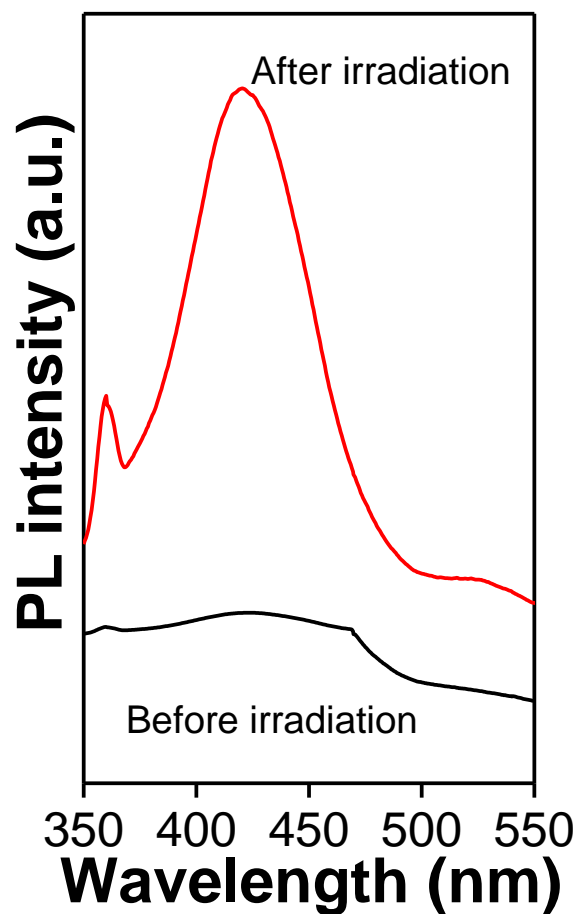

**Fig. S13** Fluorescence spectra of 3 mM terephthalic acid (TA) obtained in the presence of oxygen-deficient Cu<sub>2</sub>O nanoparticles at the  $\lambda_{\text{ex}}$  of 320 nm. Before photoexcitation, TA molecules remain non-fluorescent; however after 15 min of visible light photoexcitation, the OH<sup>•</sup> radicals generated by the photo-excited Cu<sub>2</sub>O nanoparticles readily react with TA to produce highly fluorescent 2-hydroxy terephthalic acid ( $\lambda_{\text{max}}$  ~425 nm).

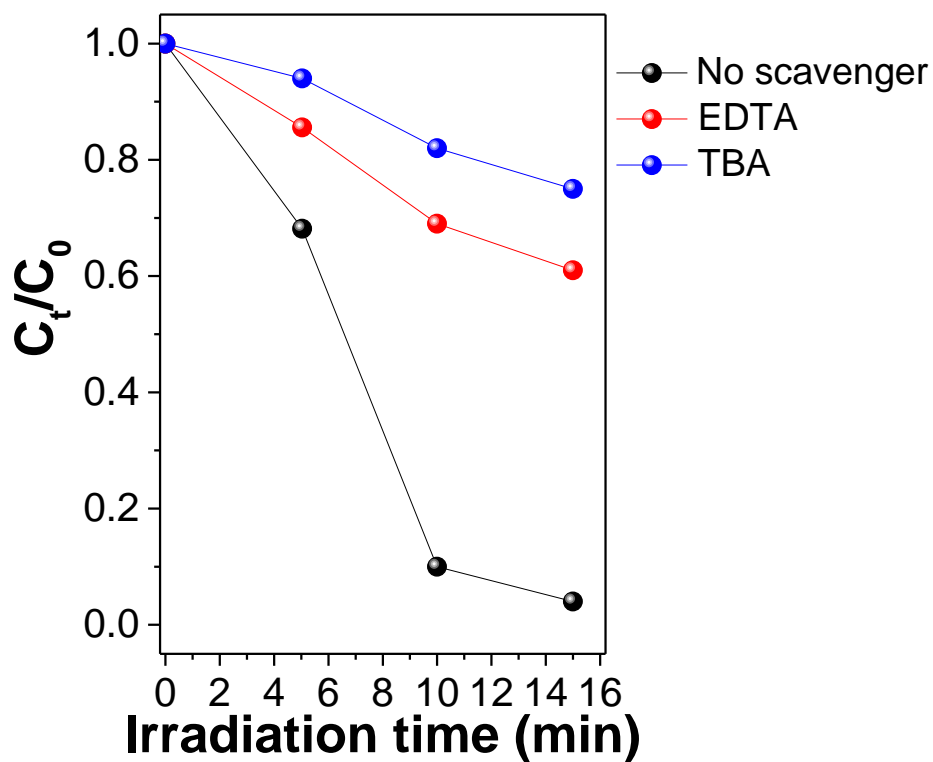

**Fig. S14** Plots of  $C_t/C_0$  versus irradiation time for oxygen-deficient  $\text{Cu}_2\text{O}$  nanoparticles-driven MO photodegradation in the presence of different scavengers. EDTA and TBA are able to suppress the photo-oxidation efficiency to 38% and 25%, respectively, in comparison to the control reaction involving no scavenger.

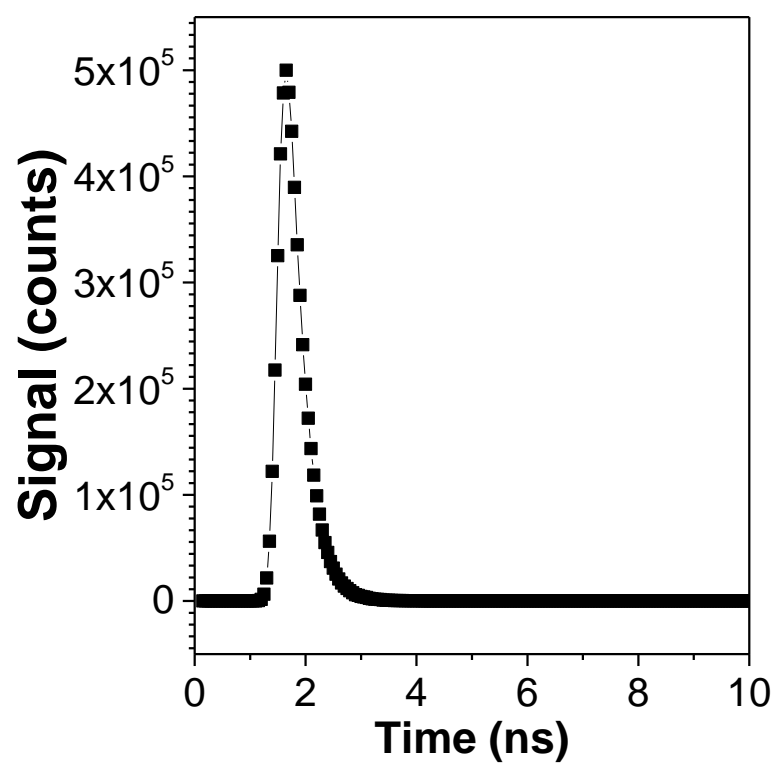

**Fig. S15** Instrument response function (IRF) for the instrument used to acquire the time resolved PL spectrum of  $\text{Cu}_2\text{O}$  nanoparticles.



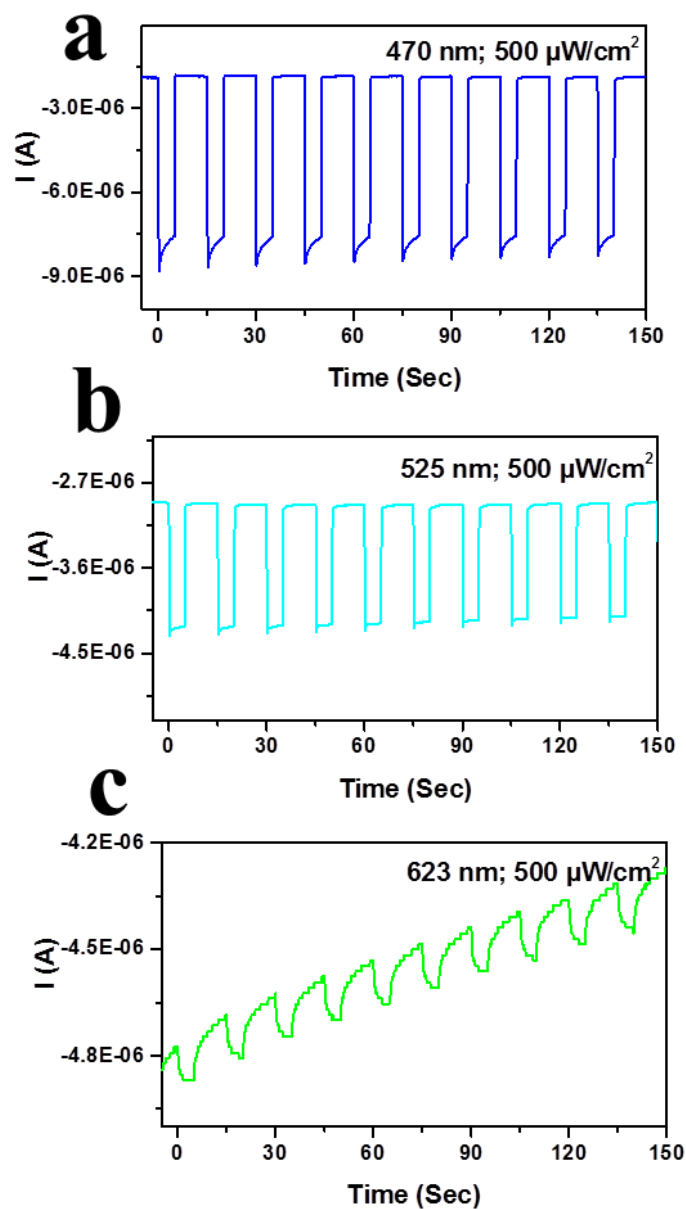

**Fig. S16** The dynamic photocurrent response repeatability of the substrate over 10 exposure cycles of constant intensity of  $500 \mu\text{W} \cdot \text{cm}^{-2}$  for wavelengths of **(a)** 470 nm, **(b)** 525 nm, and **(c)** 623 nm.
